# Supplementary material for: Cricket in a Bubble – Experience from the Sri Lanka Cricket (SLC) on Effectiveness of Maintenance of the Bio-Secure Environment during COVID-19 Pandemic
Source: Research Square preprint supplement (doi:10.21203/rs.3.rs-6821838/v1), 2025-09-02
Supplement: Supplementary file 1 [file 2629dc490990ad900df05ff2.pdf]

# Lanka Premier League (LPL) 2021

## Contents

|       |                                                           |    |
|-------|-----------------------------------------------------------|----|
| 1     | Introduction .....                                        | 3  |
| 2     | Venue Selection .....                                     | 3  |
| 3     | Tour Schedule .....                                       | 4  |
| 4     | Bio-Secure Environment (BSEs) in Colombo – Sri Lanka..... | 5  |
| 4.1   | General Measures .....                                    | 5  |
| 5     | BSE 1.....                                                | 7  |
| 5.1   | Foreign Players .....                                     | 7  |
| 5.1.1 | International Travel .....                                | 7  |
| 5.1.2 | Accommodation.....                                        | 8  |
| 5.1.3 | Training .....                                            | 9  |
| 5.1.4 | Gym .....                                                 | 9  |
| 5.2   | Local Players .....                                       | 10 |
| 6     | Other BSEs: Match Officials/Production Crew .....         | 10 |
| 6.1   | Local Participants .....                                  | 10 |
| 6.2   | Foreign participants .....                                | 11 |
| 7     | Breaching the BSE .....                                   | 11 |
| 8     | General Health Protocols.....                             | 11 |
| 8.1   | Transportation.....                                       | 11 |
| 8.2   | Ground and Practice Facility Protocols .....              | 12 |
| 8.2.1 | Team Dining area .....                                    | 13 |
| 8.3   | Tournament venue.....                                     | 13 |
| 8.4   | Zone specific risk mitigation principles .....            | 14 |
| 8.5   | Dressing/changing Rooms.....                              | 14 |
| 8.6   | On the day of the match .....                             | 14 |
| 8.6.1 | Warm up session.....                                      | 14 |
| 8.6.2 | The Toss .....                                            | 14 |
| 8.6.3 | Viewing area and Dugouts .....                            | 15 |
| 8.6.4 | Drink breaks .....                                        | 15 |
| 8.6.5 | After the match.....                                      | 15 |
| 8.7   | Cricket Balls .....                                       | 16 |
| 8.8   | Cricket Equipment .....                                   | 16 |

|      |                                                                                                                                                    |    |
|------|----------------------------------------------------------------------------------------------------------------------------------------------------|----|
| 8.9  | Water Bottles and Sunscreen.....                                                                                                                   | 16 |
| 9    | Anti-Doping Sample Collection Protocols.....                                                                                                       | 16 |
| 10   | Protocols to manage a suspected/positive COVID19 Case.....                                                                                         | 17 |
| 10.1 | Immediate response.....                                                                                                                            | 17 |
| 10.2 | Follow up management.....                                                                                                                          | 18 |
| 11   | Accommodation/Kitchen and Dining.....                                                                                                              | 18 |
| 11.1 | Kitchen and Dining.....                                                                                                                            | 19 |
| 12   | Testing Protocol for Lanka Premier League 2021- Players.....                                                                                       | 21 |
| 13   | Testing Protocol for Lanka Premier League 2021-Match Officials, production crew,<br>Hotel staff and other BSE members .....                        | 22 |
|      | Annexure 1 Type of vaccines accepted for Lanka Premier League 2021 Players, Officials,<br>production crew, Hotel staff and other BSE members ..... | 24 |
|      | Annexure 2 Spectator Events - COVID-19 Requirements for LPL 2021.....                                                                              | 25 |

## 1 Introduction

Since being declared a global pandemic in March 2020, SARS COVID 2 virus has disrupted all aspects of the World of Sport to such an extent that even the 2020 Olympic Games in Tokyo, Japan had to be postponed.

As we continue to learn more about the ever-evolving virus and accept the “new normal”, the world has gradually restarted live sport, adopting the concept of Bio-secure bubbles (BSB) and employing risk mitigation strategies to reduce the risk of infection and transmission. Sri Lanka Cricket (SLC) has been fortunate to be involved in four such inbound ventures starting from Lanka Premier League 2020 in November, England tour of Sri Lanka in January 2021, Bangladesh Tour of Sri Lanka in April -May 2021 and India tour of Sri Lanka in July 2021.

The 2020 Sri Lanka Tour of South Africa was the first outbound tour for Sri Lanka Cricket since the start of the pandemic, where the tournament was restricted to one city in order to mitigate the risk of covid-19 amidst the spike of community transmission in South Africa. Since then, Sri Lanka National Team toured West Indies in February 2021, Bangladesh in May- June 2021 and England in June- July 2021.

Lanka Premier League 2021 is scheduled for December 5<sup>th</sup> – 24<sup>th</sup> 2021. This tournament will be conducted in line with the Bio-Secure environment (BSE) concept and also this will take place behind closed doors with no spectators or advise by the Ministry of Health with the current situation in Sri Lanka.

Approval from the Director General of Health Services at Ministry of Health has been granted for the Lanka Premier League 2021 under EPID/400/2019nCoV “Health Guideline of the second edition of Lanka Premier League 2021 – December 2021” on 18<sup>th</sup> November 2021.

## 2 Venue Selection

With the current COVID -19 situation in Sri Lanka, SLC Medical panel is of the view that Colombo & Hambanthota will be the best local venues for a visiting player as the following essential infrastructure facilities to host a sporting event in a Managed Environment will be readily available:

1. Vaccinated population as a percentage
2. Government support- as it is critical to have full support and cooperation
3. Sport infrastructure in terms of appropriate match venues, practice facilities and pitches
4. Supportive medical specialties and infrastructure in terms of injuries or if someone contracted COVID-19 and required ICC/ICU, ventilatory or hospital support.
5. Easy to create a “Safe Corridor” when in need of other medical services for the Bio- Secure environment members to safely return to the BSE
6. Ability to perform required number of PCR tests and availability of results within 24 hours
7. Suitable/adequate accommodation facilities to house the squads

### 3 Tour Schedule

| LANKA PREMIER LEAGUE - 2021 - MATCH SCHEDULE |                      |          |                                   |          |       |
|----------------------------------------------|----------------------|----------|-----------------------------------|----------|-------|
| Date                                         | 3.00 pm (Day Match)  |          | 7.30 pm (Night Match)             |          | VENUE |
| Friday, December 3, 2021                     | Practice             |          |                                   |          |       |
| Saturday, December 4, 2021                   | Practice             |          |                                   |          |       |
| Sunday, December 5, 2021                     | OPENING CEREMONY     |          | Galle                             | Jaffna   | RPICS |
| Monday, December 6, 2021                     | Dambulla             | Kandy    | Colombo                           | Galle    | RPICS |
| Tuesday, December 7, 2021                    | Jaffna               | Dambulla | Kandy                             | Galle    | RPICS |
| Wednesday, December 8, 2021                  | Colombo              | Dambulla | Kandy                             | Jaffna   | RPICS |
| Thursday, December 9, 2021                   | Rest & Practice      |          |                                   |          |       |
| Friday, December 10, 2021                    | Dambulla             | Galle    | Jaffna                            | Colombo  | RPICS |
| Saturday, December 11, 2021                  | Galle                | Kandy    | Colombo                           | Dambulla | RPICS |
| Sunday, December 12, 2021                    | Jaffna               | Kandy    | Galle                             | Colombo  | RPICS |
| Monday, December 13, 2021                    |                      |          | Dambulla                          | Jaffna   | RPICS |
| Tuesday, December 14, 2021                   | Kandy                | Colombo  | Galle                             | Dambulla | RPICS |
| Wednesday, December 15, 2021                 | Rest & Practice      |          |                                   |          |       |
| Thursday, December 16, 2021                  | Colombo              | Jaffna   | Kandy                             | Dambulla | RPICS |
| Friday, December 17, 2021                    | Jaffna               | Galle    | Colombo                           | Kandy    | RPICS |
| Saturday, December 18, 2021                  | Travel to Hambantota |          |                                   |          |       |
| Sunday, December 19, 2021                    | Rest & Practice      |          |                                   |          |       |
| Monday, December 20, 2021                    | Eliminator (3 vs 4)  |          | Qualifier 1 (1 vs 2)              |          | MRICS |
| Tuesday, December 21, 2021                   |                      |          | Qualifier 2 (looser QF1 vs won E) |          | MRICS |
| Wednesday, December 22, 2021                 | Rest & Practice      |          |                                   |          |       |
| Thursday, December 23, 2021                  |                      |          | Final                             |          | MRICS |
| Friday, December 24, 2021                    |                      |          | Final (Reserve Day)               |          | MRIC  |
| Friday, December 24, 2021                    |                      |          |                                   |          |       |

## 4 Bio-Secure Environment (BSEs) in Colombo – Sri Lanka

### BSE 1

- Team members and support staff (Team Manager, coaches, Liaison officer, Physiotherapist, Masseur and Team Physician)
- Logistic staff for the teams

### BSE 2

- Umpires and Match officials
- Logistic staff for the umpires and match officials

### BSE 3

- Production crew, commentators and SLC Media
- Logistic staff for the production crew

### BSE 4

- Ground staff

\*SLC staff and venue management team – Out of Bubble but will maintain strict health guidelines

Players will be chosen from the following member countries of International Cricket council.

|             |             |              |            |
|-------------|-------------|--------------|------------|
| Afghanistan | India       | South Africa | Canada     |
| Australia   | Ireland     | Sri Lanka    | USA        |
| Bangladesh  | New Zealand | West Indies  | Netherland |
| England     | Pakistan    | Zimbabwe     | UAE        |

### 4.1 General Measures

BSE 1 – This is the main BSE inclusive of Sri Lankan and visiting players, support staff and their logistic staff. Home team will follow the health guidelines for local participants and Visiting team will follow the guidelines applicable for foreigners.

BSE 2 - All local participants who will follow the quarantine period and PCR testing protocol as local participants, Foreigners will have to follow the protocol relevant to them.

BSE 3 – In this bubble both local and foreign participants will follow their respective health and PCR protocols before they start functioning in their respective areas of work.

BSE 4 – Ground staff will maintain their BSE at the tournament venue and follow the health and PCR protocols for locals.

Two different hotels will be designated for BSE 1-3 where **BSE 1&2 will share the same hotel and BSE 3 will have a different hotel. BSE 4 will be at the ground's accommodation.**

SLC committee, ground management staff and other service providers will operate from outside the BSE and will not be allowed to interact with any BSE members unless it is deemed necessary with appropriate PPE and approval from the Chief Compliance officer of the tournament Committee.

No one will be allowed to enter a BSE if they (in the last 14 days) or anyone in their household (in the last 21 days) was unwell with potential COVID-19, and/or if they have not completed the Government-recommended isolation period.

Each BSE will have a designated accommodation facility, allocated training facility time, transportation and place in the stadium.

Follow the DReAM protocol at all times at all venues.

- Maintain the social **D**istance of at least 2m or 4m during training.
- **R**espiratory **E**tiquette, when coughing or sneezing keep the elbow to the mouth.
- **A**septic technique, always wash hands with soap or sanitize when water is not available.
- Wear the face **M**ask when not training/during matches.

All BSEs shall be physically and technically organized and monitored by the Director Quarantine, Ministry of Health with the area MOH with coordination from the tournament medical committee and SL Army.

A dedicated on-call medical team and an Army medical doctor will be appointed to Monitor the bio-security of the accommodation venues.

All Teams will have their own Medical Officer (Team Physician appointed by the Sri Lanka Cricket Medical Committee), who will be in charge of teams COVID compliances under the Chief Compliance officer of the tournament Committee.

All members of BSEs will be subject to a period of quarantine and PCR testing according to protocol provided by Epidemiology unit -Ministry of Health.

Temperature and symptom screening of all persons in a bubble shall be done daily. A non-contact medical grade thermal scanner is recommended for thermal screening. Any person recording a temperature above 99 °F or 38°C should be re-checked after 1 hour of rest. If positive for second time, consider this as a suspected case of COVID-19. Any person with symptoms suspicious of COVID-19 shall be isolated and subject to PCR testing and if positive transferred to a prior approved intermediate care facility in a designated hospital immediately for further management.

Symptom screening will be performed on each participant. If symptomatic, isolation and screening of close contacts and the rest of the medical related decisions will be done according to the Ministry of Health guidelines by the medical committee of the tournament which explained below in details.

Anyone who becomes PCR positive at any point during this testing pathway should immediately be referred for treatment at a designated intermediate health care facility (operated by the selected Private Hospital) prior approved by the Ministry of Health and SLC for a minimum of 10 days and will be only permitted into the environment on returning a negative test. If the PCR result is persistently positive, the cycle threshold results will be reviewed and a decision for entry back into the BSE will be made accordingly by the chief Complaisance's officer with instructions from Epidemiology Unit of the Ministry of Health.

All participants shall adhere to up-to-date Health guidelines issued by the Sri Lankan Health authorities.

## 5 BSE 1

### 5.1 Foreign Players

As approved by the Epidemiology Unit- Ministry of Health of Sri Lanka, all foreign players need to follow **compulsory maximum 24 hours of strict room quarantine at the Team Hotel upon arrival** until the on arrival RT- PCR results available. With negative result players will be permitted to commence training at a venue selected by SLC. On arrival RT-PCR testing will be conducted at a Government Laboratory with sequencing facility.

If vaccination completed maximum 24 hours room quarantine is mandatory. Next mandatory RT – PCR will be conducted on Day 3 and with the negative result they will be allowed to continue training & tournament

Bio-secure Environment will be formed at the designated Hotels in Colombo/ Hambanthota with RPICS / MRICS as the main training and tournament venue, while production crew and other party at their designated hotel/hotels maintain in another BSE.

#### 5.1.1 International Travel

##### 5.1.1.1 Pre-Travel

All Players and support staff should undergo one RT- PCR test within 48 hours before traveling. Self-isolation is advised during this period, allowing for only essential movement (such as practices and medical needs).

All members must carry 1 negative PCR test results on arrival. It is also advised to carry proof of vaccination as (preferably with a QR code)

##### 5.1.1.2 During Travel

All are required to wear face coverings at the airport, inflight and in transit with strict health guidelines to mitigate COVID infection.

It is recommend to keep the boarding pass with the seat number enabling easy contact tracing in the event of positive case on arrival or Day 3.

##### 5.1.1.3 On Arrival

The arriving players and support staff will head to the VIP lounge and will be processed separately. Representatives of tour organizing committee will meet them on arrival and will guide the process.

Bags will be taken off airside and placed on a luggage truck. It will be important for all pieces of luggage to be clearly labelled.

All players and support staff of will be transported to the hotel by approved transport

The driver who is in the BSE after checked in earlier with one negative RT-PCR test result taken within 48 hours and after completing his quarantine period of 3 days with negative PCR will be in full PPE

Each member of the touring party will undergo PCR testing and Rapid Antigen Testing on arrival at the hotel before checking in.

PCR test results will be available before 12 hours and if required re- cycling maximum of 24 hours.

### 5.1.2 Accommodation

All members of this BSB will be housed at the designated Hotels No other guests are expected to be at the facility. This includes all the players foreign and local with match officials/umpires

#### 5.1.2.1 Checking in

In an attempt to make the check-in process as smooth as possible to eliminate interaction, the Operations persons will send all check in information to designated hotels in advance, and each person will be given a check in form that would require a signature only. This form will be delivered on the transport from the airport and will be returned to the representative from the organizing committee.

Luggage will be sanitized on arrival and will be delivered to individual rooms by Bellmen in PPE.

#### 5.1.2.2 Isolation/Quarantine

Players and support staff are to self-isolate 24hours at the hotel room provided the person is fully vaccinated this will be only one day (24 hours)

Whilst interacting with hotel staff, members must wear face coverings at all times and must observe physical distancing of 2 meters.

Hotel staff serving the team will also arrive earlier by completing the same health guidelines and PCR testing protocol with Day 3 negative PCR test results

All Players and support staff will undergo a second PCR test on Day 3 after arrival

Once this test returns negative, the players will be allowed to train in small groups as part of their respective bubble. This will be the overall 3<sup>th</sup> Negative test within a span of 10 days. They will not be allowed to interact with other bubbles nor will they be allowed to leave the bio-secure areas of the hotel, training facility, and authorized transportation.

Thereafter RT-PCR will be carried out in every 5days

They will be allowed to enter medical /Physio rooms, but will continue to uphold COVID-19 safeguards and education

#### 5.1.2.3 Catering

For the first 3-4 days all meals will be delivered to the room until the Day 3 PCR test results are available

Day 4 and beyond, persons will be allowed to move around the hotel in their designated areas and will be allowed to dine/drink at several restaurants and bars inside the designated hotel.



Catering staff will be a part of the bio-secure bubble of the team undergoing the same health and PCR guidelines but must wear facemasks/visor and disposable gloves at all times.

Only authorized catering staff will be allowed to distribute meals

#### 5.1.2.4 Laundry

Laundry will be allowed from the day one with negative PCR test results.

Laundry bags will be provided to the room and daily collection time and return time will be stated in the information sheet provided by the hotel management on arrival.

#### 5.1.2.5 Room Cleaning

On arrival persons will find additional linen in their rooms. Housekeeping will not do, in-room cleaning until Day 3 negative results.

If additional items are required, persons can call housekeeping and it will be delivered to the room door.

After day 3, room cleaning will occur on a three (3) to four (4) day rotation as agreed by the team compliance officer/team manager.

This rotation will take match and training schedules into consideration to limit interaction with Players and Support staff with the hotel staff.

Housekeepers will use PPE and will not enter the rooms if it is occupied.

### 5.1.3 Training

The bio-secure bubble will include the hotel, authorized transport, training and match venues, Player & Match Officials Area (PMOA) and field of play.

Members will only be allowed to practice/play after the day 3 results are negative. Members must wear face masks when on the official transport (to and from training/match venues).

Support staff are encouraged to wear face masks when not performing physical activity.

Only Members of the bio-secure bubble will be allowed to interact with the players whilst at training or on the field of play.

Dressing Room attendants who are a part of a separate bio-secure bubble will get to the venue early, prepare the ice and drinks and leave the PMOA area on training days.

Liaison officer, baggage master and drivers of the busses and luggage truck will be in the same bubble as the team, following the same health guidelines and PCR testing protocol will be with the team throughout training and tournament

### 5.1.4 Gym

Allowed with defined individual/team time slots and strict sanitizing protocol

Wash hands with soap and water before entering.

Maintain physical distancing minimum 2m while in the gym.

Gym equipment will be rearranged to maintain sufficient distance between them.  
All gym equipment will be disinfected before and after every use.

Personal items (eg: Towels, water bottles) should not be shared.

Frequently touched surfaces in the gym shall be identified and cleaned before and after each session (Eg. Door handles, counter tops etc.).

Teams will be given appointments for sessions to avoid overcrowding and to ensure physical distancing.

Should attempt to keep windows open without AC in the gym, to ensure good ventilation.

## 5.2 Local Players

Need to have one negative PCR test results taken within 48 hours before checking in to the hotel.

With 1 negative test results travel only with the provided transport by the organizing committee to the designated hotel.

No strict room quarantine at the hotel is needed, however, all meals will be delivered to the room till Day 3 negative PCR.  
Players will be allowed to do small group training within the bio -secure environment until the Day 3 negative PCR.

With negative results on Day 3 PCR will allowed to play the matches, continue training.

Laundry/Room cleaning /training and Gym will be same as the visiting team.

## 6 Other BSEs: Match Officials/Production Crew

### 6.1 Local Participants

Need to have one negative PCR test results taken within 48 hours before checking in to the hotel.

With 1 negative test results travel only with the provided transport by the SLC to the designated hotel

No need of strict room quarantine at the hotel, but all will be delivered to the room till Day 3 negative No one will be allowed to visit the tournament venue till the Day 3 PCR is negative.

With negative results on Day 3 PCR the local team will be allowed to fulfil their tasks at the tournament venue

Transport to and from the training venue will be on designated vehicles for BSE

Next scheduled PCR will be on every 5 until the tournament is over

## 6.2 Foreign participants

Guests arriving in Sri Lanka shall adhere to up to date Health guidelines issued by the Sri Lankan Health authorities

Should carry 1 negative PCR test reports taken 48 hours-before boarding the flight.

Health declaration form has to be filled by all guests upon arrival

Upon arrival, at the airport, a Rapid Antigen Test and a PCR test will be carried out before checking into the selected Hotel.

Guests will be escorted to a designated hotel for room quarantine by designated vehicles only. The driver and the helper in the vehicle shall wear appropriate PPE and adhere to the protective measures.

If rapid antigen is positive, they will be directed to a different designated hotel for room isolation and considered as COVID positive, until the PCR test results are available.

No need of Strict room quarantine and following Day 3 RT-PCR negative allow to proceed with their functions at the tournament venue.

PCR will be performed on-arrival, Day 3, and every 5 days thereafter.

\*The above explain bio secure health protocol is for all participant who have completed their vaccination schedule. If vaccination is not complete they have to completed 6 days room quarantine following on arrival RT-PCR + RAT.

Their next PCR will be performer on day 3, day 6. With the negative PCR on day 6 they will be allow to participate in the event.

## 7 Breaching the BSE

The above explained BSE protocol in for all participates who how completed their vaccination schedule. If vaccination not completed they have to complete 6 days room quarantine. Following RT-PCR before participating in the event.

If someone leaves the BSE, he/she will be isolated for 7 days and will require two negative PCR tests 24 hours apart before returning to the BSB and follow the same health and PCR protocol from the beginning.

## 8 General Health Protocols

### 8.1 Transportation

Risk assessment will be performed while choosing a ground transport operator and Standard Operating Procedures will be explained to the company management as well as drivers and driver assistants.

Dedicated vehicles will be used to carry all individuals by adhering to Bio-Secure Environment protocols.

These vehicles will not be used for any other purpose for the entire duration of the tournament.

All vehicles will be thoroughly disinfected after each trip paying special attention to frequently touched surfaces.

Only designated drivers and assistants with appropriate PPE are allowed to operate the buses to transport staff who are in the Bio-Secure Environment while following the standard health and PCR protocol for their designated BSE

Before boarding the vehicle, temperature checks are mandatory for the driver and the assistant as well as all passengers.

The driver and passengers must sanitize their hands before boarding.

Driver, assistants and passengers must wear appropriate PPE at all times when traveling in the same compartment.

Maintain physical distancing while seated.

## 8.2 Ground and Practice Facility Protocols

Appropriate signage will be set up across the facility to ensure clear demarcation of various zones, entry/exit paths, social distancing and avoidance of overcrowding in zones.

Separate entry/exit corridors will be created in the stadium for the team members and all other staff.

Thorough prior cleaning and sanitization of the ground, dressing room, indoor areas (including all areas having centralized ACs) common areas, corridors, lifts, practice areas and all other places that the teams will be using must be done.

Thorough cleaning and sanitization of all washrooms and creation of verifiable controlled cleaning rotation schedule. Only individuals who are in BSE for players are permitted to enter the dressing room after declaration of point of sanitization.

All chairs in the dressing room will be rearranged in accordance with social distancing norms.

Hand-hygiene facilities will be made available adjacent to field-of-play for use as and when necessary.

Strategic placement of sanitizer bottles at all entry/exit points of ground, practice nets, dressing room, washrooms, gymnasium, physiotherapy room, medical room and any other places.

All players and staff must use their own personal water bottles. Marker pens may be used for marking each individual member's bottle once allotted.

Towels, sunscreen and lip balm must not be shared.

No spectators will be allowed entry into the stadium at any time of the day. Only team members and other accredited ground, catering and security staff will be permitted.

The ground staff will prepare the ground and the wickets outside of the team training sessions.

Restrict the number of catering and dressing room attendant staff. Only those individuals who have access to Zone 1 will be permitted in the dressing room.

Only one entry point to the stadium will be accessible and all security personnel can stop at this entry point to avoid any further close contact with the team members.

All equipment and facilities that is used will be wiped down and sanitized at the end of each training session.

All ground staff must sanitize their hands regularly as per guidelines displayed. All staff within the premises must wear a triple layer mask covering nose and mouth at all times.

All surfaces that can potentially be touched by multiple individuals shall be sanitized at regular intervals during the day.

### 8.2.1 Team Dining area

- The designated team dining area should be inside the dressing room to avoiding unnecessary contamination by using common dining area
- Only authorised personnel must be allowed admission in the team dining area. All catering staff must wash their hands frequently with soap and water, sanitize their hands regularly, must wear protective gloves and wear a triple layer mask covering nose and mouth at all times as per guidelines.
- Supply chain for food items must have a separate entry point to minimise contact with main dining area. Only pre-ordered packaged food will be served in the dressing rooms.
- Only designated catering staff will come to the ground on all training/match days. They will remain only in the dining area and avoid contact with other catering staff outside of the Bio-Secure Environment.

## 8.3 Tournament venue

Spectators. **Refer the annexure 2** (If allows)

Facilities for hand washing with soap and water preferably with a foot operated tap at the entrance of the tournament venue.

Everybody entering the tournament venue including their own staff must wash their hands before entering.

Everybody entering the tournament venue must wear face masks except for the players when engaging in training and playing the match.

Every person should maintain minimum of 2m physical distance with others at all times.

Management of the venue shall ensure that contact details of all the persons participating in the cricket tournament are recorded except for foreign team and local players.

Technical and any other staff working in the venue will not be allowed to mix with any other persons participating in the event.

Management will clean and disinfect the commonly touched surfaces after every session under the supervision of the area MOH.

Tournament venue cleaning staff will not be allowed to go home on a daily basis. PCR to be arranged before returning home.

## 8.4 Zone specific risk mitigation principles

Within the Bio-Secure Environment, a zoning principle will be applied to further reduce interactions and hence reduce the risks of cross infection.

The stadium Bio-Secure Environment will be divided into the following zones:

- Zone 1 – Dressing room, Match Official's room and Field of Play
- Zone 2 – Inner Zone – All operational areas within the stadium complex
- Zone 3 – Outer Zone – The area outside the stadium complex but within the boundary walls

## 8.5 Dressing/changing Rooms

Wash hands with soap and water.

Players and staff will maintain physical distancing while in the dressing room.

Frequently touched surfaces will be identified and cleaned minimum of 3 times a day (more frequent cleaning when in use) according to standard protocols. Cleaning schedule to be displayed clearly (e.g. washrooms, changing rooms).

Avoid sharing items in the dressing room.

## 8.6 On the day of the match

All players and staff should have completed their daily Medical screening before participating.

Players and staff should walk to the Player and Match Officials Area (PMOA) via the designated one-way route from the drop off point

Everyone must sanitize their hands before entering

Everyone should wear a facemask while within the PMOA.

### 8.6.1 Warm up session

Physical distancing should be maintained (2m) from individuals outside of the BSB.

If using communal equipment (e.g. a medicine ball), the equipment should be sanitized after each use.

### 8.6.2 The Toss

Physical distancing (at least 2m) should be maintained.

No mascots should be present.

There will be no handshaking.

Media should maintain the required distance.

### 8.6.3 Viewing area and Dugouts

Players and staff should only sit in designated seats while maintaining a distance of 2 meters.

Match day medical staff and the match day doctor and the team (MDD) should be stationed separated from players.

There should be no sharing of personal items between persons.

### 8.6.4 Drink breaks

The 12<sup>th</sup> man carrying drinks shall sanitize hands prior to the break.

All players will sanitize their hands before and after the break.

Players will only use disposable bottles and towels and avoid sharing them.

Keep 2-meter distance with each other during the break.

Towels should be used only once and ensure adequate supply of towels.

The person who handles used towels shall wear gloves, face masks and face shield (appropriate PPE).

These towels shall be collected separately in a bag and washed separately.

All disposable materials shall be collected into sealed bags and handed over to local authority for disposal according to their protocols.

### 8.6.5 After the match

Handshakes or physical contacts are not allowed between players. They may engage in non-contact greetings maintaining distance.

Only the official media will be allowed in the in-field for post-match presentations but technology will allow virtual interviewing, no face to face interviews are allowed at any time.

All must practice physical distancing in the field.

Any trophies or awards should be disinfected and then placed onto the podium.

Video conferencing will be used for press conferences.

Players, support staff and match officials should avoid taking showers at the stadium.

All will leave the venue at the earliest and use the defined one-way route to return to their designated vehicles.

If Anti-doping officials are present, they will maintain physical distancing where possible whilst testing and must wear appropriate PPE.

## 8.7 Cricket Balls

The management of the cricket ball would be subject to ICC guidelines.

Saliva should not be applied on the cricket ball.

Players shall avoid touching their faces while playing to minimize possible cross contamination from the cricket ball.

Players and coaching staff must have individual hand sanitizers during training sessions.

## 8.8 Cricket Equipment

Players and staff should use their own equipment and they shall not be shared

## 8.9 Water Bottles and Sunscreen

All players and staff should use disposable water bottles.

Towels, sunscreen and lip balm should not be shared.

# 9 Anti-Doping Sample Collection Protocols

DCO and the team will be operating out of the BSE and need to maintain the following protocol pre and during testing

### a. On arrival at testing venue

- On the day of the testing mission, DCP will have to arrive at the testing venue one hour before the start of the scheduled mission to allow time for health check, screening, and RAT
- Upon completion of the health screening process, the main compliance officer will escort the DCP to the Doping Control station.
- DCP will remain in their dedicated zones.
- DCP must wear facemask covering nose and mouth and appropriate PPE at all times.
- The random selection of players can be done via use of technology between the team managers and the DCP.

### b. Notification

- Upon completion of training session/match, the Match Management Team member will liaise with the team managers to facilitate notification. Please note that the DCP will notify the players for doping control.
- Social distancing of 2 meters to be maintained at all times including when chaperoning the players.



- The players will be instructed not to go to the dressing room and instead proceed directly to the DCS upon completion of the after-match activities on the field of play.
- The chaperones will keep a watch on these players while maintaining a distance of minimum 2 meters.

c. Doping Control Station

- The Doping Control Station (DCS) will be positioned in one part of the ground at a strategic location away from the dressing rooms.
- The DCS will be a large room with minimum furniture. The DCO's desk will be positioned in such a way that the urine sample collection can be watched from a distance.
- The DCS will be disinfected and set up for testing prior to DCP proceeding for notification.
- All DCP to wear the necessary PPE at all times.
- Players must be wearing a face mask covering nose and mouth at all times
- Surfaces will be disinfected, and hands washed regularly during the sample collection process.
- Consider a gap of 5 minutes between players to ensure the DCS is disinfected and ready for the next player.
- The necessary paperwork can be done by following rules of social distancing.

d. On completion of testing

- DCP will clean down the DCS
- DCP will safely discard items/waste and deposit it in a garbage bag which is sealed and disposed immediately after the end of the mission.
- DCP will collect all their equipment and exit the premises still being escorted by the Main compliances officer.

## 10 Protocols to manage a suspected/positive COVID19 Case

- Suspected cases shall be immediately isolated from the rest.
- The Team Medical Officer will inform the tournament medical director and in-charge army medical person to handle the participant. With the involvement of area MOH and the Regional Epidemiologist immediately follow the government approved protocol. All positive COVID-19 cases will be notified to the Epidemiology Unit as a mandatory government requirement
- Transfer the person to the designated Intermediate care centre (isolation hotel) or hospital depending on his/her clinical condition.
- Close contacts should be identified and isolate until the diagnosis is made on the suspected patient. If positive, continue the same procedure as a positive case. If test negative, necessary to undergo quarantine and this decision will be on individual basis by the medical committee. During the quarantine period not allowed to attend any activities. These include physical exercise, training outside etc. for the players.
- All staff handling suspected cases must mandatorily wear appropriate PPE while handling a suspected / positive COVID-19 case.
- Disinfect the place when the suspected person has left as per the Health Ministry protocols.

### 10.1 Immediate response

- Suspected/positive cases will be immediately isolated from rest of the squad.

- The Team Doctor/Doctor in charge will inform the Chief Compliance officer immediately.
- The local Health Authority will be immediately notified of the positive RT-PCR test result.
- The case will be managed in close coordination with accredited hospitals and treatment centres equipped with COVID-19 testing and treatment.
- All concerned cases shall be dealt with as per the guidelines set by the Government applicable to that particular area.
- Contact tracing must commence immediately. All individuals who have been in close contact with the case during the previous 48 hours starting from the time of collection of the sample which resulted in a positive test, will be quarantined and tested. All casual contacts in the last 48 hours starting from the time of collection of the sample which resulted in a positive test, will also be tested immediately.
- All staff handling positive cases must mandatorily wear a full PPE kit (goggles, face shield, N95 mask, gloves, coverall/gowns, head cover and shoe covers) while handling a suspected/positive COVID-19 case.

## 10.2 Follow up management

- If the individual is asymptomatic or has mild symptoms, he/she will be isolated in the designated Intermediate health care facility outside the Bio-Secure Environment for 10 days from the first day of symptoms or the date of collection of samples which resulted in a positive RT-PCR report whichever is earlier.
- During the 10-day isolation, the individual must rest and avoid any exercises.
- The doctor in charge should regularly monitor the case.
- If symptoms worsen during the course of isolation, the individual must be hospitalised immediately.

## 11 Accommodation/Kitchen and Dining

- Hotel(s) shall follow the guidelines stipulated in section 4.3 of the "OPERATIONAL GUIDELINES ON PREPAREDNESS AND RESPONSE FOR COVID-19 OUTBREAK FOR WORK SETTINGS" issued by the Ministry of health on 17th April 2020. Additionally, the "Operational Guidelines with Health Protocols" issued by Sri Lanka Tourism on June 2020 may be referred.
- Hotel staff will have to follow the same PCR testing protocol as the local BSE members and should complete the Day 3 PCR test with negative results to receive the participants
- A full risk assessment must be performed while choosing hotels which will accommodate the teams, match officials, other staff in the Bio-Secure Environment and venue operations teams. Standard Operating Procedures must be explained to the Hotel Management. The following are principles which need to be followed while choosing the hotels and for the hotels to undertake.
- Players, support staff, Match officials and umpires will be accommodated in one hotel to prevent interacting with people outside the bio-secure bubble. Preferably, smaller hotel properties should be chosen and fully booked for the exclusive use by the teams. This will avoid players and support staff coming in contact with other guests in the hotel.
- All aspects of the risk mitigation principles already outlined in this document must be in place.
- A dedicated check-in counter must be arranged for the team members.
- A separate entry and exit gate should be available for the team members.

- A dedicated lift should be available for the exclusive use of the team members.
- Exclusive access to a gym, swimming pool and beach (if any) must be available for use of the team members.
- Each hotel should have a designated hotel manager.
- Within their zones, players and team support staff must be provided safe corridors for movement within the hotel.
- Only essential staff must be on site, who all wear facemasks, practice social distancing and regularly wash their hands.
- Dedicated hotel staff, security staff and any other personnel to serve the teams during their stay at the hotel. All such staff must quarantine in the hotel for 3 days and undergo 3 COVID-19 RT-PCR tests on Day 1, Day 3 before the arrival of the teams and Day 6. All staff will be tested twice a week throughout the tournament.
- All staff must undergo the COVID-19 education program.
- The dedicated staff serving the team members must be part of the Bio-Secure Environment throughout the tournament and must follow all the protocols mandated under Bio-Secure Environment mentioned in the document above.
- Frequently touched surfaces e.g. door handles, lift buttons, etc must be identified and sanitised on a regular basis.
- Hotel rooms must be serviced prior to players and staff occupying them. UV-C disinfection of the rooms must be done after housekeeping staff have cleaned the room.
- Enough towels, bed linen and cleaning equipment should be available if players and staff require them between services.
- All luggage including player's kit bags must be sanitised upon arrival before being sent to the respective rooms.
- The AC units should have UV-C disinfection.
- A dedicated room for UV-C disinfection of all incoming items must be provided. Luggage, kit bags and food parcels ordered from outside the hotel premises should be sanitised using UV-C disinfection devices before delivery to respective rooms.
- Zero contact housekeeping and in-room service protocols will be followed. Hotel staff will deliver all items outside the room, ring the doorbell and leave. Members should open the door and collect the items a minute after the hotel staff has left.
- Players must be given specific time slots for pool sessions to avoid overcrowding and maintain social distancing protocols. This is allowed only after completion of the said quarantine period
- The washrooms and toilet areas on pool floor must be thoroughly disinfected.
- A separate space within the Bio-Secure Environment must be identified which will serve as the designated Sample Collection Room for RT-PCR tests.
- Pre- Identified Isolation room should available in case of suspected case of COVID 19

## 11.1 Kitchen and Dining

- Preparation of the food must be to the highest health and safety and food hygiene standards; any appropriate additional measures should be considered for COVID-19.
- Chefs must wear gloves and a facemask.
- They must also ensure regular hand hygiene.
- Hand touch sites must be identified and cleaned on a regular basis.
- Staff must thoroughly clean the kitchen after use by themselves or designated cleaning staff.

- Access to the kitchen must be restricted after the end of the shift, deep clean the kitchen in between shifts.
- Chefs should either work alone or ensure social distancing.
- If a buffet service is provided, a dedicated hotel staff who has been tested and quarantined must serve all individuals. They must wash their hands, use gloves before serving the food.
- Hotel staff at the buffet must be kept to a minimum to support the service. They must be wearing facemasks and practising regular hand hygiene.
- Food must not be eaten in the communal dining area unless social distancing can be easily maintained. If it cannot, any food should be eaten as room service.
- All staff must wear facemasks within the hotel.
- All plates and cutlery must be disinfected after washing.
- Chefs will hand over the cooked food to the staff who will deliver it to the player's room. There will be zero touch interaction between the chef and team's serving staff

## 12 Testing Protocol for Lanka Premier League 2021- Players

BSE to BSE transfer Players will have the same protocol with few alterations with their mandatory quarantine period (Criteria to transfer from BSE to BSE is mentioned below)

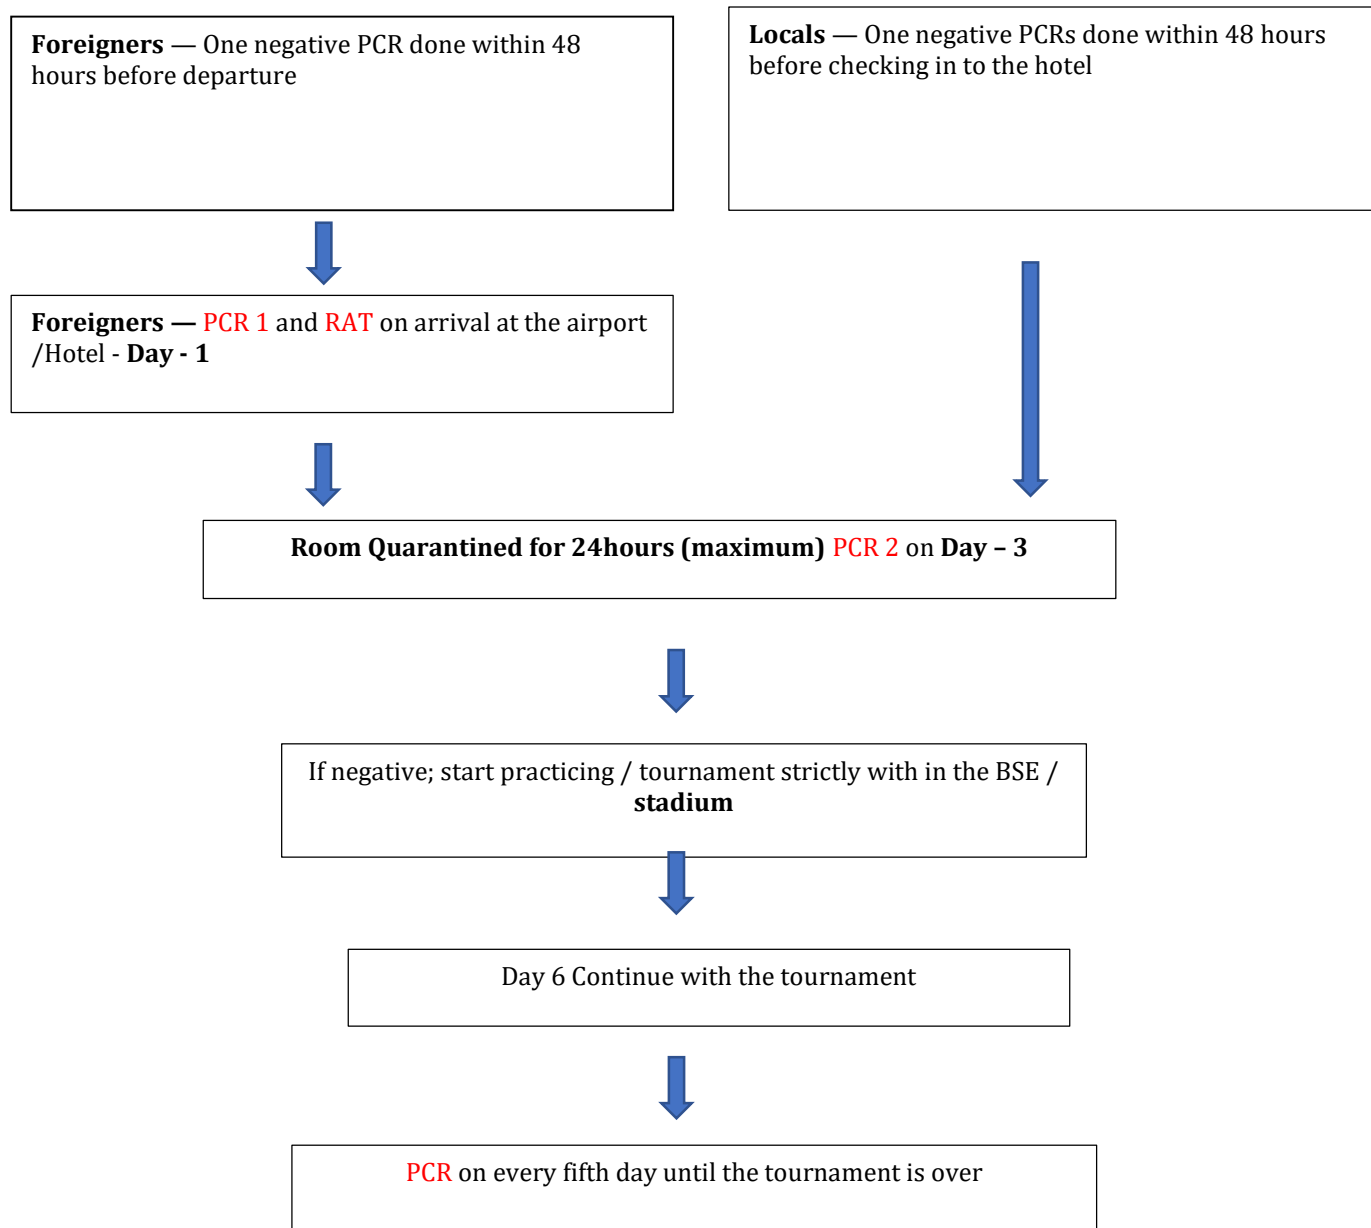

Any player who becomes PCR positive or symptomatic at any point during this testing pathway should immediately be referred for treatment at a designated intermediate care facility/ health facility prior approved by the Ministry of Health and LPL management committee

### 13. Testing Protocol for Lanka Premier League 2021-Match Officials, production crew, Hotel staff and other BSE members

Most of the production crew members will be transferred from BSE to BSE following West Indies Tour of Sri Lanka 2021 (Criteria to transfer from BSE to BSE is mentioned below)

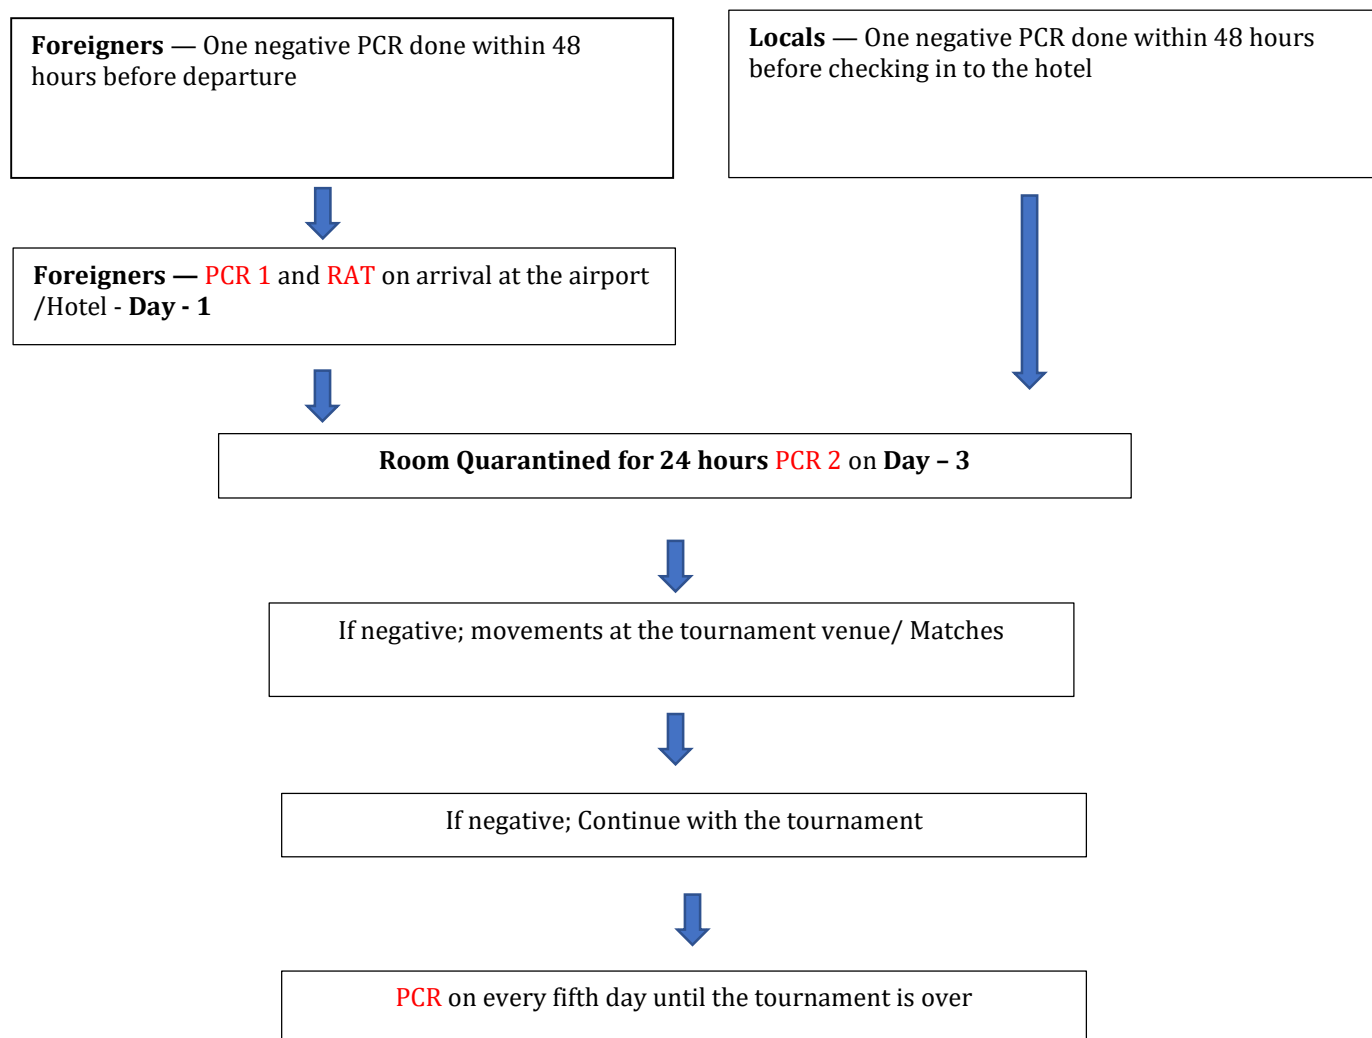

Anyone who becomes PCR positive or symptomatic at any point during this testing pathway should immediately be referred for treatment at a designated intermediate care facility/ health facility prior approved by the Ministry of Health and LPL management committee

### BSE to BSE transfer criteria

1. BSE should be from a Bi-Lateral tournament and the health protocol needs to be shared for pre-approval by Sri Lanka Ministry of Health
2. BSE should be from a Bi-Lateral tournament maintained and monitored by the Ministry of Health/Sri Lanka Army and Sri Lanka Cricket if in Sri Lanka
3. Following one BSE the members are not allowed to go out to the community
4. BSE to BSE transfer should happen in a BSE transport
5. Members should have a negative RT-PCR taken within 48 hours from the current BSE before transfer.

## Annexure 1

### Type of vaccines accepted for Lanka Premier League 2021 Players, Officials, production crew, Hotel staff and other BSE members

1. Pfizer BioNTech Manufacturing GmbH -BNT162b2/COMIRNATY Tozinameran (INN)
2. AstraZeneca, AB -AZD1222 Vaxzevria, AZD1222 Vaxzevria, AZD1222 Vaxzevria, AZD1222 Vaxzevria
3. Covishield (ChAdOx1\_nCoV-19) - Covishield (ChAdOx1\_nCoV-19)
4. Janssen–Cilag International NV -Ad26.COV2.S (Johnson & Johnson's Janssen COVID-19 Vaccine)
5. Moderna Biotech - mRNA-1273
6. Sinopharm/BIBP- SARS-CoV-2 Vaccine (Vero Cell), Inactivated (InCoV)
7. Sinovac Life Sciences Co., Ltd. - COVID-19 Vaccine (Vero Cell), Inactivated/ Coronavac™
8. Sputnik V
9. Bharat Biotech, India- SARS-CoV-2 Vaccine, Inactivated (Vero Cell)/ COVAXIN
10. Sinopharm / WIBP2 Inactivated SARS-CoV-2 Vaccine (Vero Cell)
11. Novavax - NVX-CoV2373/Covovax
12. Sanofi - CoV2 preS dTM-AS03 vaccine
13. Serum Institute of India Pvt Ltd - NVX-CoV2373/Covovax
14. Clover Biopharmaceuticals - SCB-2019
15. URE VAC - Zorecimeran (INN) concentrate and solvent for dispersion for injection

**Note: Completing second dose of the vaccine, after 14 days considered as completed. However only for Janssen 14 days after single dose considered as completed.**



## Spectator Events - COVID-19 Requirements for LPL 2021

### General Information

- Open to a capacity of not more than 50% of per section capacity
- All spectators allowed to the stadium should complete their vaccination schedule (Need to pass 14 days from the second dose)
- Conditions will be re-evaluated to assess whether a further increase/decrease in percentage seating capacity depending on the country's situation of COVID-19
- A facility must have individual designated seating capability. Open, unreserved seating not allowed.
- A facility must have controlled entrances and exits and the ability to monitor exact attendance.
- Facility must have a plan for handling congestion and reducing crowding, including entrance and exits, parking facilities, stairs and elevators, and any areas where lines form. Facility management will monitor the execution of the plan
- Tickets must be sold online in groups of 1-15. Each group of 1-15 spectators must be 6 feet away (side- to-side and front-to-back) from other groups of 1-15.
- Facilities with benches, bleachers or non- numbered seating must block off a portion of seating to ensure groups are distanced
- Removal of facial masks only allowed while actively eating or drinking in assigned seating.
- Lines for restrooms must be marked to ensure 6 feet a distance between each person waiting in line. All restrooms should be open to increase dispersion of users among restrooms facilities.
- Lines may not extend out into designated walkways in a way that impedes the flow and/or compromises the ability to appropriately physically distance in those designated walkways
- Spectators are not allowed in other spaces than their designated according to the entrance ticket.
- To identify the area, all the spectators will be given a wrist band at the entrance
- Management shall also ensure that spectators should not be allowed to mix with any participants/staff in the event
- Spectators should follow the DReAM protocol at all times
  - Maintain the social Distance of at least 2m or 4m 2 during training
  - **R**espiratory **e**tiquette, when coughing or sneezing keep the elbow to the mouth
  - **A**septic technique, always wash hands with soap or sanitize when water is not available
  - Wear the face **M**ask
- Isolation room should be pre-identified for spectators and should be freely available for any suspected case
- Separate Doctor, medical team and an Ambulance should be available at the stadium: one hour before the match and until the last spectator leaves the ground.

## **Entrance**

- There should be separate entrances for each spectator area
- At all entrances there should be an automatic /leg operated wash basin/hand wash /sanitize for the spectators wash their hands before entering to the premises
- Daily temperature should be monitored at the entrance. If > 38.0C entry should not be allowed. Temperature above 98.6F or 38C will be re-Checked after one hour of rest
- If positive at second reading this should be considered as suspected case of COVID
- Organizers/Management will have the authority to request for RAT if suspected/ necessary
- If anyone becomes positive or symptomatic at any point during testing/screening, should immediately isolated and will be informed the area MOH for further management according to the MOH guidelines
- Registry should be maintained of all the spectators enter the premises at each entrance and should be available for health authorities to inspect at any time
- The registry Should include names, ID numbers, contact details and entry and exit times
- Colour coded wrist band should be provided to all the spectators to identify their designated place

## **Spectator Areas and Seating Arrangements**

- Boxes or other indoor viewing areas, including dine-in food service areas, limited to be not more than 50% capacity and windows are required to be open at all times
- Outdoor viewing areas without permanent seating (decks, grass berms, eating areas etc.) are limited to one seated group (1-6 people) per 100 square ft. Each group will be in a reserved space, only available to the group who purchased a specific location.
- Facility staff must monitor and restrict interactions between groups. Each outdoor viewing area. Each outdoor viewing area has not more than 50% of spectators.
- There should be a separate walk way to all the areas with clearly marked signage
- Wash rooms should be identified for these areas separately
- Cleaning the wash rooms should be according to the public health authority guidelines and the records on the cleaning procedure should be available for inspection
- No alcohol beverages are allowed to any spectator areas
