# Supplementary material for: Cricket in a Bubble – Experience from the Sri Lanka Cricket (SLC) on Effectiveness of Maintenance of the Bio-Secure Environment during COVID-19 Pandemic
Source: Research Square preprint supplement (doi:10.21203/rs.3.rs-6821838/v1), 2025-09-02
Supplement: Supplementary file 2 [file f969ce31551f2a98cd883b69.pdf]

## Supplementary Material 2:

### Weekly Bio-Secure Environment (BSE) Monitoring Questionnaire

#### *Purpose*

This form is used to collect weekly data from Bio-Secure Environment (BSEs) established during the 2021 Lanka Premier League (LPL) tournament. The goal is to support evidence-based adjustments to health protocols and BSE measures, in order to enhance safety and minimize the risk of COVID-19 transmission among all BSE members.

#### Section 1: General Information

- Your Email Address -
- Event/Tournament detail -
- Starting Date of BSE -
- Data collection Period
  - From -
  - To -
- Location of the BSE-

#### Section 2: Participant Categories and Numbers

2.1 Please indicate the presence of each participant category during the data collection period: (Tick all that apply)

- A: SL team (Players and support staff)
- B: Visiting team (Players and support staff)
- C: SL additional staff (Drivers, assistants and baggage masters)
- D: Visiting team support staff (Drivers, assistants and baggage masters)
- E: Medical officers and Umpires
- F: Hotel staff
- G: Production crew
- H: Production crew additional staff (Drivers)
- I: Anti Corruption
- J: Security
- K: Match venue Ground staff
- L: Other

2.1 Number of participants during this period (Per category)

| A | B | C | D | E | F | G | H | I | J | K | L |
|---|---|---|---|---|---|---|---|---|---|---|---|
|   |   |   |   |   |   |   |   |   |   |   |   |

### Section 3: Symptomatology

3.1 Were there any symptomatic participants during this period? Yes/ No

If yes, please answer the following:

3.1.a. Specify the symptoms and signs observed:

3.2 Were the symptomatic participants informed to the Chief Medical Officer? Yes/ No

*(Note: Please inform any symptomatic participants immediately to the Chief Medical Officer)*

3.3 If yes, when were they informed?

Date/ Time:

3.4 What measures were taken for the symptomatic participants:

### Section 4: Testing and Medical Management

4.1 Before Entry to BSE

Type of COVID-19 test conducted:

| <i>Type type</i>       | <i>Number of tests performed</i> | <i>Number of positives</i> |
|------------------------|----------------------------------|----------------------------|
| RAT                    |                                  |                            |
| RT-PCR                 |                                  |                            |
| COVID-19 antibody test |                                  |                            |
| Other                  |                                  |                            |

Place of Testing:

Measures taken for positive cases:

| <i>Measures taken for test positives</i>              | <i>RAT</i> | <i>RT-PCR</i> | <i>COVID-19 Ab</i> |
|-------------------------------------------------------|------------|---------------|--------------------|
| <input type="radio"/> Isolated in the same place      |            |               |                    |
| <input type="radio"/> Transferred to ICC – Private    |            |               |                    |
| <input type="radio"/> Transferred to ICC – Government |            |               |                    |
| <input type="radio"/> None                            |            |               |                    |
| <input type="radio"/> Other                           |            |               |                    |

4.2 At Entry to BSE

Type of COVID-19 test conducted:

| <i>Test Type</i>       | <i>Number of Tests</i> | <i>Number of Positives</i> |
|------------------------|------------------------|----------------------------|
| RAT                    |                        |                            |
| RT-PCR                 |                        |                            |
| COVID-19 antibody test |                        |                            |
| Other                  |                        |                            |

Place of Testing:

Measures Taken for Positive Cases:

| <i>Measures taken for test positives</i>              | <i>RAT</i> | <i>RT-PCR</i> | <i>COVID-19 Ab</i> |
|-------------------------------------------------------|------------|---------------|--------------------|
| <input type="radio"/> Isolated in the same place      |            |               |                    |
| <input type="radio"/> Transferred to ICC – Private    |            |               |                    |
| <input type="radio"/> Transferred to ICC – Government |            |               |                    |
| <input type="radio"/> None                            |            |               |                    |
| <input type="radio"/> Other                           |            |               |                    |

#### 4.3 Within the BSE

Reason for Repeated Testing:

Type of COVID-19 test conducted:

| <i>Type of laboratory test conducted</i> | <i>Number of tests performed</i> | <i>Number of test positives</i> |
|------------------------------------------|----------------------------------|---------------------------------|
| RAT                                      |                                  |                                 |
| RT-PCR                                   |                                  |                                 |
| COVID-19 antibody test                   |                                  |                                 |
| Other                                    |                                  |                                 |

Place of Testing:

Measures Taken for Positive Cases:

| <i>Measures taken for test positives</i>              | <i>RAT</i> | <i>RT-PCR</i> | <i>COVID-19 Ab</i> |
|-------------------------------------------------------|------------|---------------|--------------------|
| <input type="radio"/> Isolated in the same place      |            |               |                    |
| <input type="radio"/> Transferred to ICC – Private    |            |               |                    |
| <input type="radio"/> Transferred to ICC – Government |            |               |                    |
| <input type="radio"/> None                            |            |               |                    |
| <input type="radio"/> Other                           |            |               |                    |

#### Section 5: Temporary Exit from BSE

5.1 Were there any instances where members had to leave the BSE? – Yes/No

5.2 If yes, please specify the reasons:

- Medical
- Official
- Personal
- Other (specify):

5.3 Number of times BSE was excited under ‘Green Corridor’ protocol:

- Medical:
- Official:
- Personal:
- Other (specify)-

➤ Further requirements (Eg: PPE needed):

➤ Additional Remarks:

**Submission Notes:**

Please ensure the form is completed accurately and submitted weekly. Your data contributes directly to the ongoing safety and the effectiveness of the BSE protocol.
